# Supplementary material for: Saliva pools for screening of human cytomegalovirus using real-time PCR
Source: Springer Nature journal article supplement (doi:10.1007/s00431-020-03842-x), 2020-10-14
Supplement: MOESM1 [file 18483684]

10 saliva samples

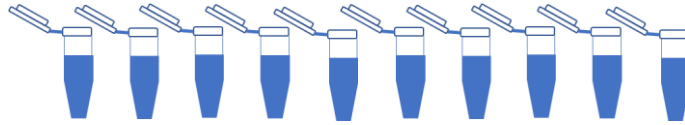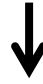

Pipetting 20 $\mu$ L of each sample to the same eppendorf

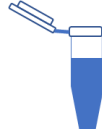

Saliva pool (200 $\mu$ L)

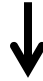

Pool DNA Extraction + Real Time PCR Reaction

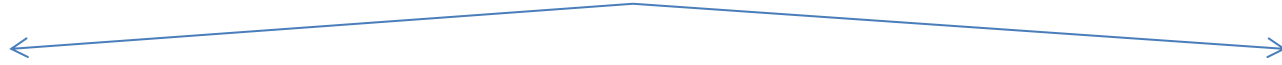

**POSITIVE RESULT**

Pipetting 200 $\mu$ L of each sample to an eppendorf

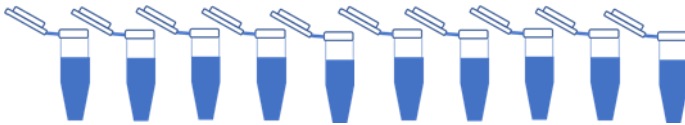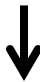

DNA Extraction + Real Time PCR Reaction of the 10 samples

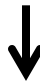

Positive(s) sample(s) for HCMV DNA are identified

**NEGATIVE RESULT**

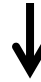

All 10 saliva samples are negative  
for HCMV DNA
